# Supplementary material
Source: PubMed Central journal article supplement (PMC10193466)
Supplement: SupplementaryTables1and2_PEDS22-367.pdf [file SupplementaryTables1and2_PEDS22-367.pdf]

**ONLINE ONLY**

## **Supplemental material**

**Comparison of neurocognitive and quality-of-life outcomes in pediatric craniopharyngioma patients treated with partial resection and radiotherapy versus gross-total resection only**

Aldave et al.

<https://thejns.org/doi/abs/10.3171/2022.12.PEDS22367>

**DISCLAIMER** The *Journal of Neurosurgery* acknowledges that the following section is published verbatim as submitted by the authors and did not go through either the *Journal's* peer-review or editing process.

Supplementary Table 1. *Linear Mixed Models of Neurocognitive Change over Time by Treatment**Group and Index Score*

| <b>VCI Change</b>              | <b>Beta</b> | <b>95% CI</b> | <b>p</b> |
|--------------------------------|-------------|---------------|----------|
| Slope: GTR                     | 0.45        | -1.01 – 1.90  | .528     |
| Slope: PR+RT                   | -0.33       | -1.82 – 1.17  | .654     |
| Slope Difference: GTR vs PR+RT | 0.77        | -1.31 – 2.86  | .448     |
| <b>PRI Change</b>              |             |               |          |
| Slope: GTR                     | -0.80       | -3.60 – 1.94  | .516     |
| Slope: PR+RT                   | -0.64       | -3.49 – 2.21  | .634     |
| Slope Difference: GTR vs PR+RT | -0.20       | -4.18 – 3.78  | .914     |
| <b>WMI Change</b>              |             |               |          |
| Slope: GTR                     | -0.14       | -2.54 – 2.26  | .905     |
| Slope: PR+RT                   | 0.48        | -1.87 – 2.83  | .680     |
| Slope Difference: GTR vs PR+RT | -0.62       | -3.97 – 2.73  | .706     |
| <b>PSI Change</b>              |             |               |          |
| Slope: GTR                     | 0.29        | -1.80 – 2.38  | .766     |
| Slope: PR+RT                   | -0.94       | -3.34 – 1.46  | .426     |
| Slope Difference: GTR vs PR+RT | 1.23        | -1.94 – 4.41  | .423     |
| <b>FSIQ Change</b>             |             |               |          |
| Slope: GTR                     | -0.12       | -2.17 – 1.93  | .901     |
| Slope: PR+RT                   | -0.50       | -2.50 – 1.49  | .604     |
| Slope Difference: GTR vs PR+RT | -0.40       | -2.48 – 3.24  | .783     |

*Note.* Models were adjusted for clinical covariates significant on univariate comparisons: treated hydrocephalus. Beta reported for each slope represents the increase/decrease in points per year on each index by treatment group. Slope difference compares slopes (i.e., change in scores over time)

between treatment groups on each index. FSIQ = Full Scale IQ; VCI = Verbal Comprehension Index; PRI = Perceptual Reasoning Index; WMI = Working Memory Index; PSI = Processing Speed Index.

Supplementary Table 2. *Linear Mixed Models of Quality of Life Change over Time by Treatment*

*Group and PedsQL Composite Score*

| <b>PedsQL Physical</b>         | <b>Child Report</b> |               |          | <b>Parent Report</b> |               |          |
|--------------------------------|---------------------|---------------|----------|----------------------|---------------|----------|
|                                | <b>Beta</b>         | <b>95% CI</b> | <b>p</b> | <b>Beta</b>          | <b>95% CI</b> | <b>p</b> |
| Slope: GTR                     | 2.32                | -1.12 – 5.76  | .151     | -.26                 | -4.86 – 4.34  | .899     |
| Slope: PR+RT                   | -2.05               | -5.6 – 1.49   | .244     | 1.59                 | -3.47 – 6.65  | .502     |
| Slope Difference: GTR vs PR+RT | 4.37                |               | .350     | 1.85                 |               | .557     |
| <b>PedsQL Emotional</b>        |                     |               |          |                      |               |          |
| Slope: GTR                     | 0.79                | -4.10 – 5.68  | .706     | 0.15                 | -4.15 – 4.44  | .943     |
| Slope: PR+RT                   | -2.13               | -7.33 – 3.08  | .373     | -0.63                | -5.36 – 4.09  | .779     |
| Slope Difference: GTR vs PR+RT | 2.84                |               | .365     | 0.78                 |               | .797     |
| <b>PedsQL Social</b>           |                     |               |          |                      |               |          |
| Slope: GTR                     | 0.84                | -3.72 – 5.41  | .638     | -3.00                | -7.65 – 1.65  | .187     |
| Slope: PR+RT                   | 0.01                | -4.49 – 4.50  | .998     | -2.09                | -7.46 – 3.28  | .417     |
| Slope Difference: GTR vs PR+RT | 0.83                |               | .764     | 0.91                 |               | .786     |
| <b>PedsQL School</b>           |                     |               |          |                      |               |          |
| Slope: GTR                     | -0.99               | 5.62 – 3.65   | .638     | -1.46                | 5.62 – 2.69   | .465     |
| Slope: PR+RT                   | -2.39               | -7.28 – 2.50  | .313     | 0.25                 | -4.6 – 5.1    | .915     |
| Slope Difference: GTR vs PR+RT | 1.40                |               | .655     | 1.71                 |               | .579     |
| <b>PedsQL Total</b>            |                     |               |          |                      |               |          |
| Slope: GTR                     | -0.30               | -4.11 – 3.5   | .866     | -1.80                | -5.76 – 2.17  | .347     |
| Slope: PR+RT                   | -2.24               | -6.48 – 2.01  | .277     | 0.71                 | -3.70 – 5.12  | .737     |
| Slope Difference: GTR vs PR+RT | 1.96                |               | .479     | 2.51                 |               | .381     |

Note. Models were adjusted for clinical covariates significant on univariate comparisons: treated hydrocephalus. Beta reported for each slope represents the increase/decrease in points per year on

each PedsQL Composite Score by treatment group. Slope difference compares slopes (i.e., change in scores over time) between treatment groups on each score.
